# Supplementary material for: Reproduction of a fossil rhinoceros from 18 mya and origin of litter size in perissodactyls
Source: PubMed Central journal article supplement (PMC10514446; doi:10.1016/j.isci.2023.107800), 2023-09-01
Supplement: mmc1.pdf [file mmc1.pdf]

**iScience, Volume 26**

**Supplemental information**

**Reproduction of a fossil rhinoceros from 18 mya  
and origin of litter size in perissodactyls**

**Xiao-Kang Lu, Tao Deng, Paul Rummy, Xiao-Ting Zheng, and Yuan-Tao Zhang**

Supplementary Information

Supplementary figures

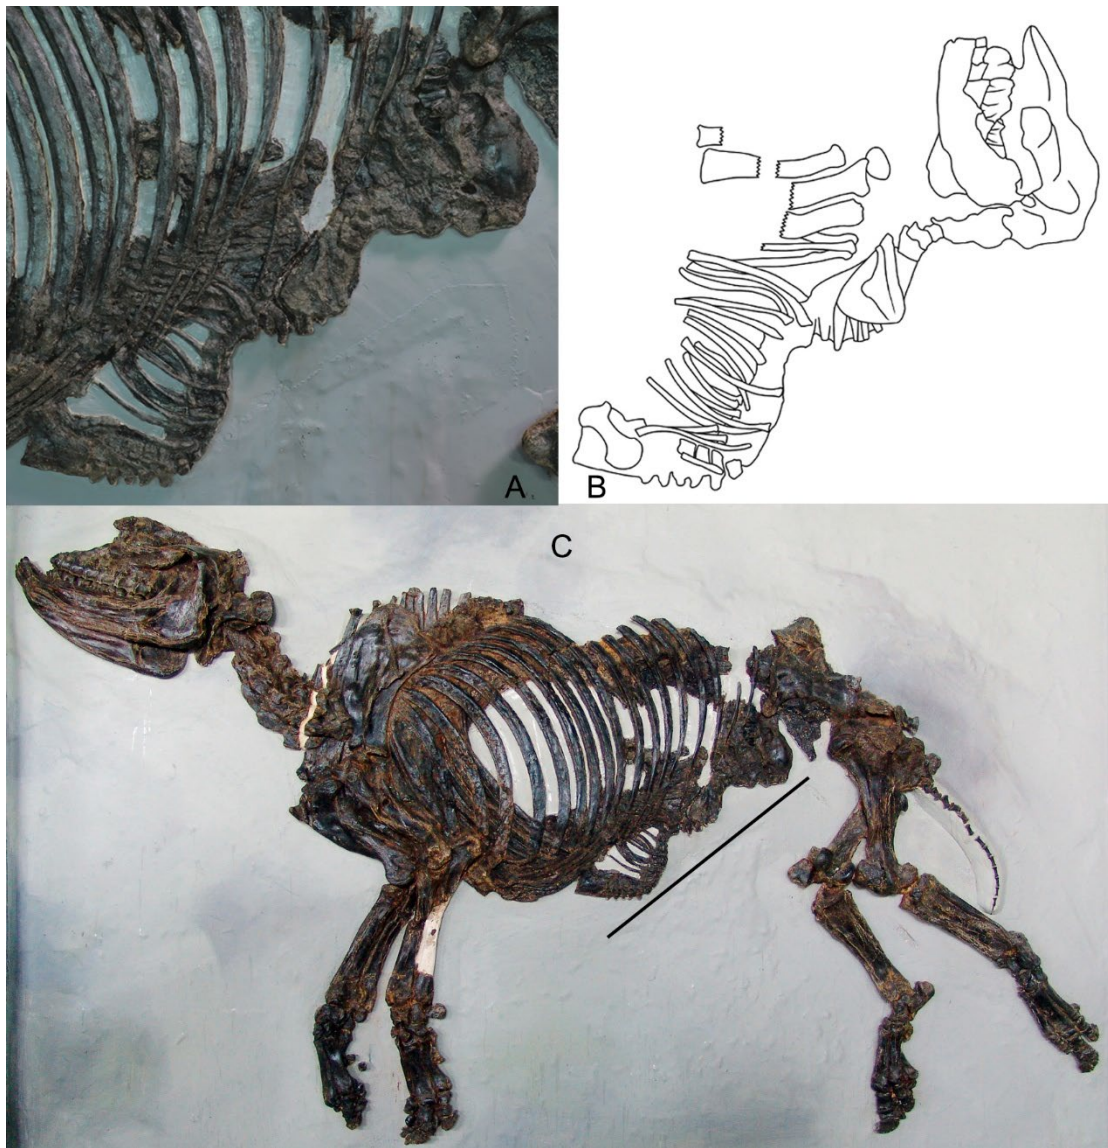

**Figure S1.** Pregnant skeleton of *Plesiaceratherium gracile* from the Early Miocene 18 mya. a, b, foetus fossil and drawing; c, adult skeleton, with third molar at moderately worn stage. Related to Figure 1.

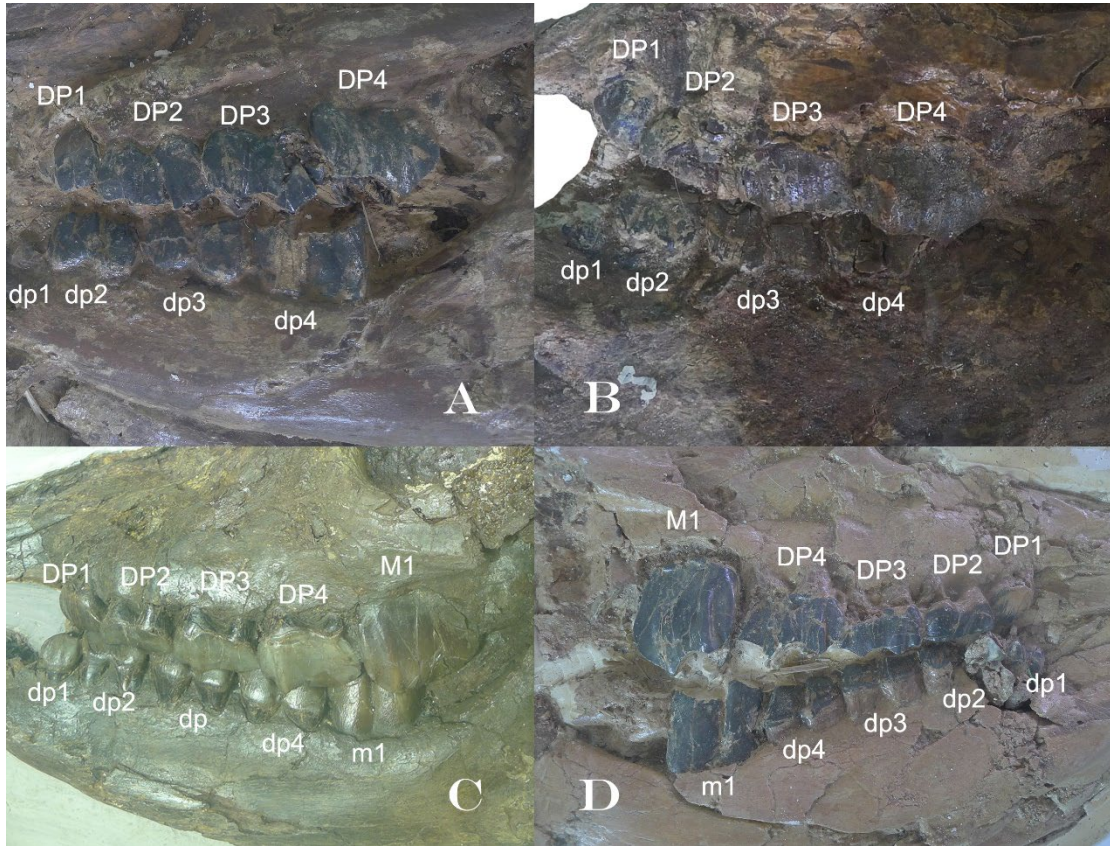

12

13 **Figure S2.** Skulls of *Plesiaceratherium gracile* with tooth eruption sequence, A, STM 44-116; B,

14 STM 44-113; C; GSP 126; D, STM 44-77. All samples are sealed in glass box, not to scale.

15 Related to Figure 1.

16

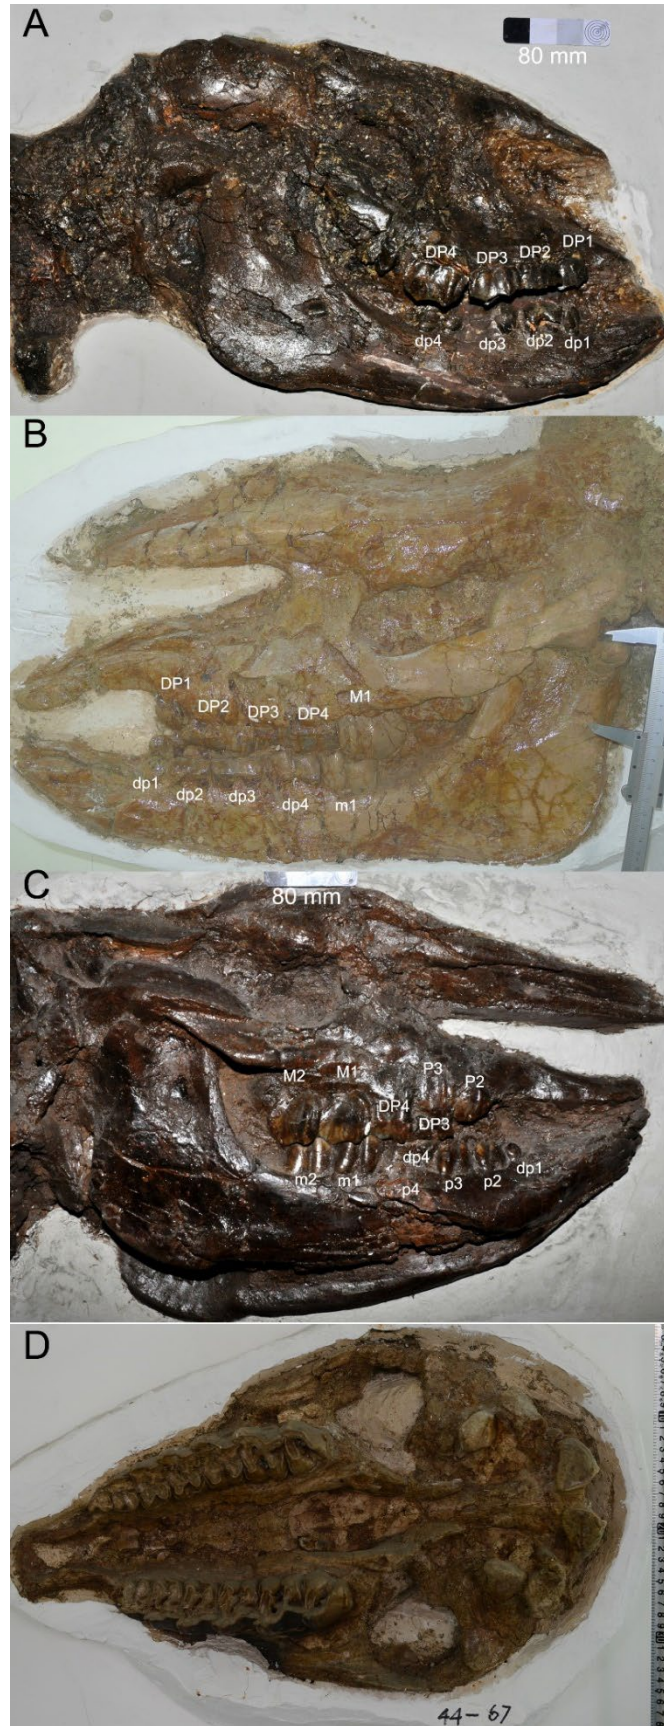

17

18 **Figure S3.** Skulls of *Plesiaceratherium gracile* with tooth eruption sequence, A, S700016; B, STM

19 44-64; C, S700017; D, STM 44-67. Related to Figure 1.

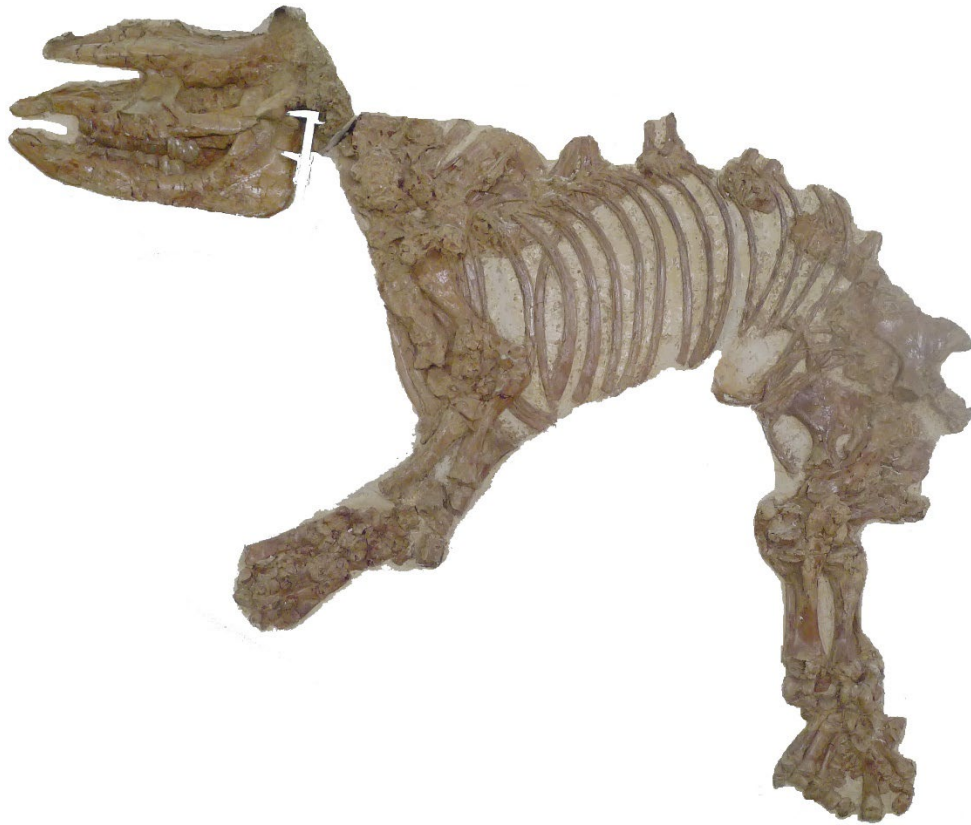

20

21 **Figure S4.** Skeleton of *Plesiaceratherium gracile*, STM 44-64. Related to Figure 1.

22

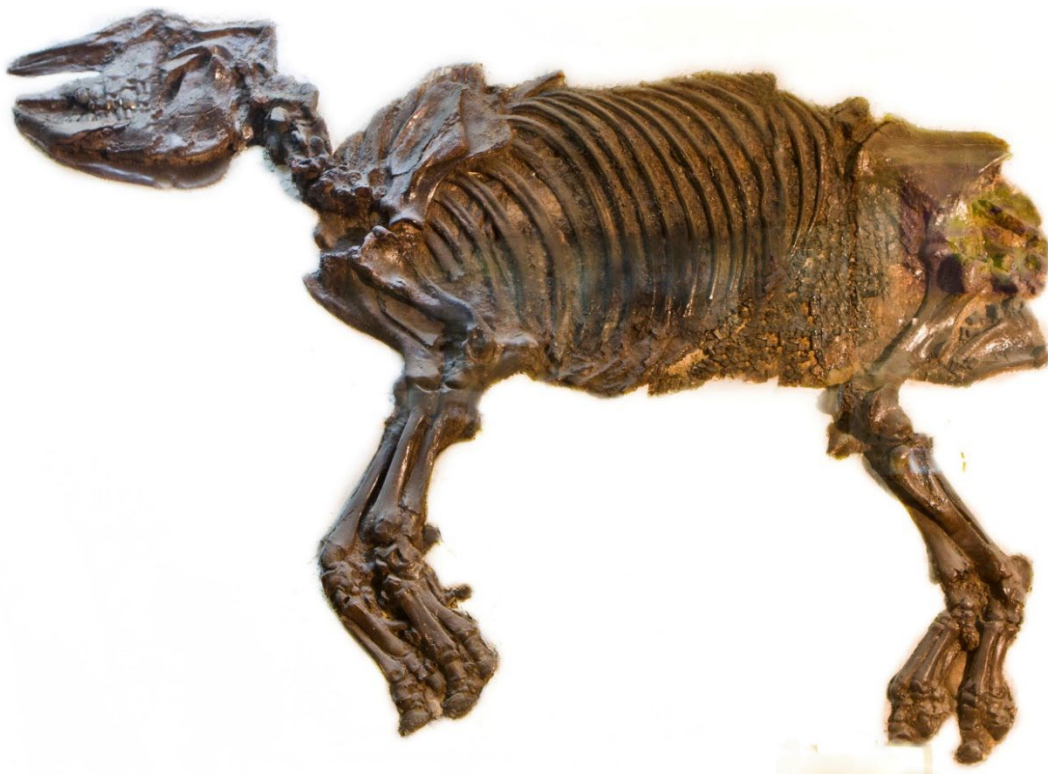

23

24 **Figure S5.** Skeleton of *Plesiaceratherium gracile*, S 700017. Related to Figure 1.

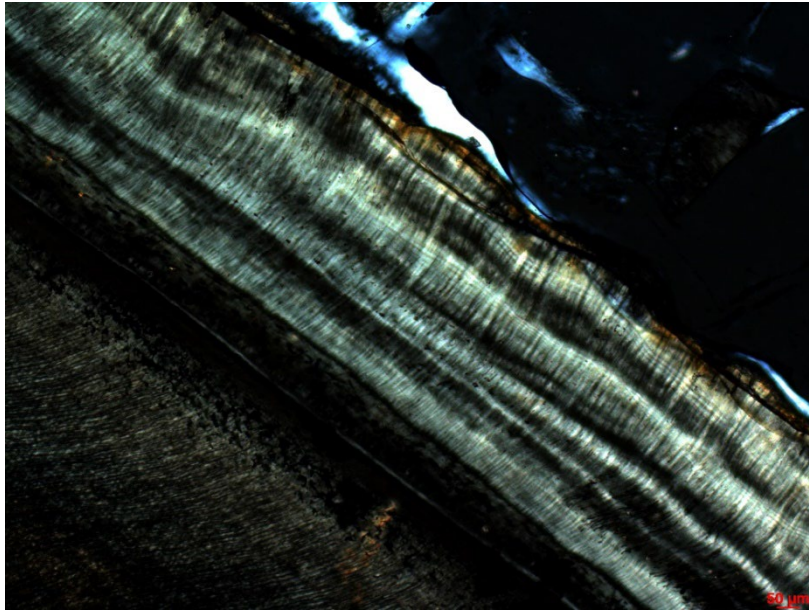

26

27 **Figure S6.** Cementum around the root below the crown-root joint of DP1 (GSP 127) of  
 28 *Plesiaceratherium gracile*, the annual growth lines are badly stratified. Related to Figure 2.

29

30

31

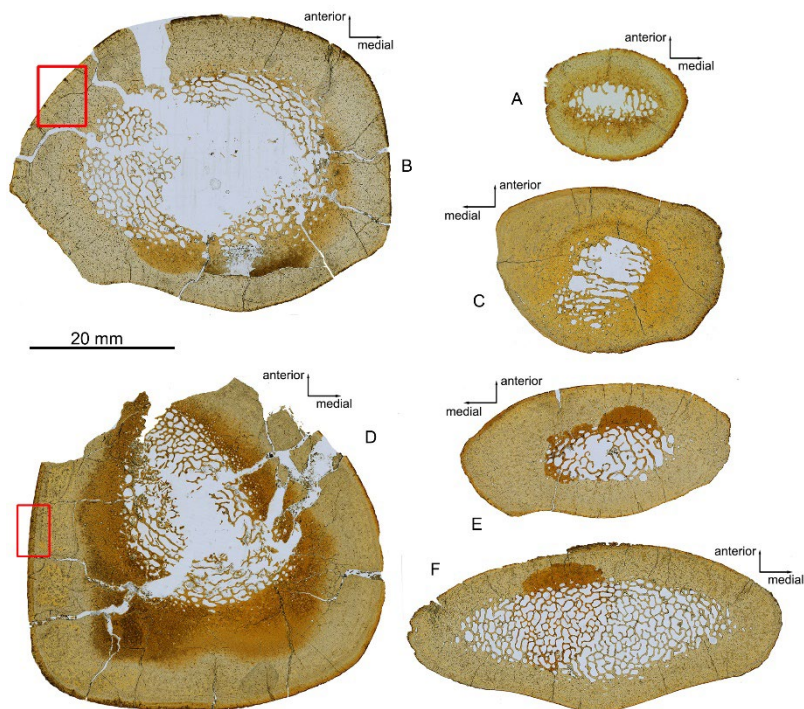

32

33 **Figure S7.** Cross-section of limb bones of skeleton (STM 44-167) *Plesiaceratherium gracile*. A,  
 34 rib; B, radius; C, Mt IV; D, tibia; E, Mc II; F, Mc III. The red box of radius and tibia marked the  
 35 position of exaggerated pictures in text figure 3. Related to Figure 3.

## Supplementary tables

Table S1. Measures and ratio of skull and mandible of *Plesiaceratherium gracile* from the Early Miocene Shanwang Basin, China (mm). Related to Figure 1 and 4.

|          | 1    | 2    | 3    | 4    | 5    | 6    | 7    | 8    | 9    | 10   | 11   | 12   | 13   | 14   | 15   | 16   | 17   | 18   |
|----------|------|------|------|------|------|------|------|------|------|------|------|------|------|------|------|------|------|------|
| measures | 421  | 364  | 348  | 98   | 157  | 193  | 210  | 187  | 53   | 138  | 41   | 159  | 341  | 74   | 153  | 94   | 64   | 140  |
| ratio    | 0.66 | 0.57 | 0.54 | 0.41 | 0.56 | 0.62 | 0.62 | 0.68 | 0.7  | 0.42 | 0.34 | 0.62 | 0.62 | 0.54 | 0.64 | 0.61 | 0.67 | 0.57 |
| measures | 510  | 490  | 432  | 161  | 148  | 178  | 204  | 234  | 46   | 198  | 80   | 190  | 457  | 118  | 188  | 124  |      |      |
| ratio    | 0.8  | 0.76 | 0.66 | 0.67 | 0.53 | 0.57 | 0.6  | 0.85 | 0.61 | 0.6  | 0.66 | 0.74 | 0.83 | 0.86 | 0.79 | 0.8  | 0    | 0    |
| measures | 572  | 587  | 593  | 236  | 245  | 276  | 308  | 239  | 56   | 294  | 72   | 216  | 480  | 132  | 218  | 124  | 78   | 203  |
| ratio    | 0.9  | 0.92 | 0.91 | 0.99 | 0.87 | 0.88 | 0.9  | 0.87 | 0.74 | 0.89 | 0.59 | 0.84 | 0.88 | 0.96 | 0.91 | 0.8  | 0.81 | 0.83 |

1. Occipital condyle-Premaxillae; 2. Occipital condyle-Premaxillae; 3. Occipital crest-Nasal bone; 4. Nasal length; 5. Occipital condyle-Postorbital process; 6. Occipital condyle-Supraorbital process; 7. Occipital condyle-Anteriororbital process; 8. Occipital condyle-M3; 9. Nasal notch-Orbit; 10. Nasal tip-Orbit; 11. Maxillary diastema; 12. Upper cheek teeth row; 13. Mandible length; 14. Mandible symphysis; 15. Mandible condyle height; 16. Ramus width; 17. Mandible diastema; 18. Lower cheek teeth row. Ratio is to mean adult lengths that are from Lu et al. (2020).

Table S2. Measures and ratio of postcranial bones of *Plesiaceratherium gracile* from the Early Miocene Shanwang Basin, China (mm). Related to Figure 1 and 4.

| Specimens         |                               | Scapula<br>Length | Humerus<br>Length | Radius<br>Length | Mc II<br>Length | Mc III<br>Length | Mc IV<br>Length | Femur<br>Length | Tibia<br>Length | Mt II<br>Length | Mt III<br>Length | Mt IV<br>Length |
|-------------------|-------------------------------|-------------------|-------------------|------------------|-----------------|------------------|-----------------|-----------------|-----------------|-----------------|------------------|-----------------|
| 44-64             | measures                      | 226               | 275               | 268              |                 | 158              |                 | 310             | 260             | 130             | 145              | 126             |
|                   | ratio to mean<br>adult length | 0.5622            | 0.7143            | 0.7614           |                 | 0.8272           | 0.9359          | 0.654           | 0.7386          | 0.828           | 0.8146           | 0.8235          |
| S700017           | measures                      | 355               | 355               | 317              | 158             | 178              | 146             | 422             | 325             | 165             | 174              | 145             |
|                   | ratio to mean<br>adult length | 0.8831            | 0.9221            | 0.9006           | 0.9576          | 0.9319           |                 | 0.8903          | 0.9233          | 1.051           | 0.9775           | 0.9477          |
| Mean adult length | measures                      | 402               | 385               | 352              | 165             | 191              | 156             | 474             | 352             | 157             | 178              | 153             |

Ratio is to mean adult lengths that are from Lu et al. (2020).



Table S3. Measure and ratio of skull of living black rhinoceros (mm). Related to Figure 1 and 4.

| development stage | basal length |         | ratio  | mandible length |         | ratio  |
|-------------------|--------------|---------|--------|-----------------|---------|--------|
|                   | Mean         | Range   |        | Mean            | Range   |        |
| 1                 | 221          | 213-229 | 0.4011 | 192             |         | 0.4174 |
| 2                 |              |         | 0      | 248             |         | 0.5391 |
| 3                 | 317          |         | 0.5753 | 274             | 266-280 | 0.5957 |
| 4                 | 380          |         | 0.6897 | 316             | 307-323 | 0.687  |
| 5                 | 435          |         | 0.7895 | 354             | 336-378 | 0.7696 |
| 6                 | 465          |         | 0.8439 | 380             | 350-406 | 0.8261 |
| 7                 | 477          | 428-525 | 0.8657 | 403             | 359-430 | 0.8761 |
| 8                 | 511          |         | 0.9274 | 433             | 409-453 | 0.9413 |
| 9                 | 503          | 476-530 | 0.9129 | 436             | 404-464 | 0.9478 |
| 10                | 516          | 493-534 | 0.9365 | 441             | 418-485 | 0.9587 |
| 11 (adult)        | 529          | 520-544 | 0.9601 | 450             | 425-478 | 0.9783 |
| 12                | 532          | 510-552 | 1      | 450             | 409-476 | 0.9783 |
| 13                | 536          | 517-560 | 0.971  | 461             | 425-484 | 1.0066 |
| 14                | 549          | 504-580 | 0.9946 | 454             | 423-484 | 0.9913 |
| 15                | 550          | 522-581 | 0.9964 | 458             | 427-487 | 1      |
| 16                | 548          | 504-585 | 0.9928 | 458             | 426-516 |        |
| 17                | 550          | 517-582 | 0.9964 | 463             | 442-482 |        |
| 18                | 557          | 536-598 | 1.0091 | 464             | 434-490 |        |
| 19                | 575          | 545-618 | 1.0417 | 469             | 448-502 |        |
| 20                | 567          | 546-592 | 1.0272 | 464             | 444-496 |        |

Ratio is to mean adult length. All data are from Goddard, 1970.

Table S4. Measure and ratio of skull of living white rhinoceros (mm). Related to Figure 1 and 4.

|          | greatest length | ratio | basal length | ratio | condyle-nasal | ratio | upper tooth row | ratio | lower tooth row | ratio |
|----------|-----------------|-------|--------------|-------|---------------|-------|-----------------|-------|-----------------|-------|
| 1        |                 |       |              |       |               |       |                 |       |                 |       |
| 2        |                 |       |              |       |               |       |                 |       |                 |       |
| 3        | 304             |       | 326          | 0.47  | 302           | 0.47  | 125             | 0.46  | 125             | 0.47  |
| 4        |                 | 0.41  |              | 0     |               | 0     | 160             | 0.59  |                 | 0     |
| 5        | 480             | 0     | 530          | 0.76  | 498           | 0.77  | 202             | 0.75  | 205             | 0.76  |
| 6        | 565             | 0.64  | 590          | 0.85  | 533           | 0.82  | 203             | 0.75  | 199             | 0.74  |
| 7        | 637             | 0.75  | 630          | 0.91  | 593           | 0.92  | 197             | 0.73  | 202             | 0.75  |
| 8        | 674             | 0.85  | 670          | 0.96  | 588           | 0.91  | 230             | 0.85  | 231             | 0.86  |
| 9        | 657             | 0.9   |              | 0     | 593           | 0.92  | 228             | 0.84  |                 | 0     |
| 10       | 695             | 0.88  | 663          | 0.95  | 611           | 0.94  | 245             | 0.91  | 250             | 0.93  |
| 11 adult | 733             | 0.93  | 689          | 0.99  | 618           | 0.96  | 244             | 0.9   | 263             | 0.98  |
| 12       | 740             | 0.98  | 695          | 1     | 621           | 0.96  | 274             | 1.01  | 272             | 1.01  |
| 13       | 740             | 0.99  | 679          | 0.98  | 623           | 0.96  | 247             | 0.91  | 275             | 1.03  |
| 14       | 756             | 0.99  | 716          | 1.03  | 647           | 1     | 270             | 1     | 268             | 1     |
| 15       | 767             | 1.01  |              |       |               |       |                 |       |                 |       |

Ratio is to mean adult length. All data are from Hillman-Smith, 1986.

Table S5. Biological traits of living rhinoceroses. Related to Figure 5.

| Items                       | <i>C. simum</i> | <i>R. unicornis</i> | <i>D. bicornis</i> | <i>R. sondaicus</i> | <i>D. sumatrensis</i> |
|-----------------------------|-----------------|---------------------|--------------------|---------------------|-----------------------|
| gestation                   | 481-550 days    | 459-494 days        | 419-476 days       | ?                   | 473-480 days          |
| birth weight                | 48-60 kg        | 40-60 kg            | 23-48 kg           | ?                   | 23-33 kg              |
| weaning                     | 1-2 years       | 1-2 years           | 1-2 years          | 1-2 years           | 1-2 years             |
| sex mature (female)         | 3 years         | 3 years             | 4 years            | 3-4 years           | 4 years               |
| first birth (female)        | 4-5 years       | 4-5 years           | 4-5 years          | ?                   | 5 years               |
| birth interval<br>(minimum) | 2-3 years       | 2-3 years           | 2-3 years          | ?                   | 3-4 years             |
| skeleton mature             | 10-12 years     | 6-10 years          | 8-10 years         | ?                   | 10 years              |
| body weight                 | 1800-3600kg     | 1600kg-2400kg       | 886-1400 kg        | 900-1500 kg         | 600-800kg,            |
| life span                   | 35-50 years     | 40 years            | 20-34 years        | 30-40 years in wild | 25-40 years           |
| max span                    | 57 years        | 47 years            | 57 years           | ?                   | 47 years              |

Data of *Ceratotherium simum* (Groves, 1972; Hillman-Smith, 1986); *Rhinoceros unicornis* (Laurie et al., 1983); *Diceros bicornis* (Hillman-Smith and Groves, 1994); *Rhinoceros sondaicus* (Groves and Leslie, 2011); *Dicerorhinus sumatrensis* (Plair et al., 2012).

Table S6. Life span (year) estimation of living rhinoceroses and *Plesiaceratherium* based on body weight (kg). Related to Figure 5.

| equations for life span estimation                     | <i>C. simum</i> | <i>D. bicornis</i> | <i>R. unicornis</i> | <i>R. sondaicus</i> | <i>D. sumatrensis</i> | <i>P. gracile</i> |
|--------------------------------------------------------|-----------------|--------------------|---------------------|---------------------|-----------------------|-------------------|
| Weight                                                 | 2286            | 996                | 1844                | 1750                | 1046                  | 1198              |
| $y=630W^{0.17}$<br>(Blueweiss, 1978)                   | 21              | 18                 | 20                  | 20                  | 18                    | 19                |
| $y=4.11W^{0.162}$<br>(Magalhães et al., 2007)          | 45              | 40                 | 44                  | 43                  | 40                    | 41                |
| $y=3.34W^{0.193}$<br>(maximum, Magalhães et al., 2007) | 56              | 48                 | 54                  | 54                  | 48                    | 50                |
| $y=2.66W^{0.22}$<br>(Western, 1979)                    | 67              | 56                 | 64                  | 63                  | 56                    | 58                |

Body weight data of *Ceratotherium simum* (Groves, 1972; Hillman-Smith, 1986); *Rhinoceros unicornis* (Laurie et al., 1983); *Diceros bicornis* (Hillman-Smith and Groves, 1994); *Rhinoceros sondaicus* (Groves and Leslie, 2011); *Dicerorhinus sumatrensis* (Plair et al., 2012); *Plesiaceratherium gracile* (Lu et al. 2021).

Table S7. Sex maturity (year) estimation of living rhinoceroses and *Plesiaceratherium* based on body weight (kg). Related to Figure 5.

|                                                | <i>C. simum</i> | <i>D. bicornis</i> | <i>R. unicornis</i> | <i>R. sondaicus</i> | <i>D. sumatrensis</i> | <i>P. gracile</i> |
|------------------------------------------------|-----------------|--------------------|---------------------|---------------------|-----------------------|-------------------|
| $y=0.214W^{0.263}$<br>(Magalhães et al., 2007) | 6               | 5                  | 6                   | 6                   | 5                     | 5                 |

Body weight data of *Ceratotherium simum* (Groves, 1972; Hillman-Smith, 1986); *Rhinoceros unicornis* (Laurie et al., 1983); *Diceros bicornis* (Hillman-Smith and Groves, 1994); *Rhinoceros sondaicus* (Groves and Leslie, 2011); *Dicerorhinus sumatrensis* (Plair et al., 2012); *Plesiaceratherium gracile* (Lu et al. 2021).

Table S8. Skull measure of two living African rhinoceroses and two fossil rhinoceroses. Related to Figure 5.

| Dental development stage | <i>Diceros bicornis</i> | <i>Ceratotherium simum</i> | <i>Chilotherium simum</i> | <i>Plesiaceratherium gracile</i> |
|--------------------------|-------------------------|----------------------------|---------------------------|----------------------------------|
| 1                        | 221                     |                            |                           |                                  |
| 2                        |                         |                            |                           |                                  |
| 3                        | 317                     | 304                        |                           |                                  |
| 4                        | 380                     |                            |                           | 407                              |
| 5                        | 435                     | 480                        | 363                       |                                  |
| 6                        | 465                     | 565                        |                           | 485                              |
| 7                        | 477                     | 637                        | 436                       |                                  |
| 8                        | 511                     | 674                        | 474                       | 572                              |
| 9                        | 503                     | 657                        |                           |                                  |
| 10                       | 516                     | 695                        |                           |                                  |
| 11                       | 529                     | 733                        |                           |                                  |
| 12                       | 532                     | 740                        | 500                       | 636.5                            |
| 13                       | 536                     | 740                        | 528                       | 624.25                           |
| 14                       | 549                     | 756                        | 483                       | 625.25                           |
| 15                       | 550                     | 767                        |                           | 644                              |
| 16                       | 548                     |                            |                           | 666                              |
| 17                       | 550                     |                            |                           |                                  |
| 18                       | 557                     |                            |                           |                                  |
| 19                       | 575                     |                            |                           |                                  |
| 20                       | 567                     |                            |                           |                                  |

Data of *Ceratotherium simum* from Hillman-Smith, 1986; *Diceros bicornis* from Goddard, 1970; *Chilotherium simum* from Deng, 2001; *Plesiaceratherium gracile* from Lu et al., 2021.

1  
2  
3

Table S9. Skull length of ungulates in this study through the Paleogene to the Quaternary. Related to Figure 5.

| species                          | references                    | age                        | geography                 | skull-length |
|----------------------------------|-------------------------------|----------------------------|---------------------------|--------------|
| <i>Tetraclaenodon puercensis</i> | Kondrashov et al., 2012       | Early Paleocene            | North American            | 114          |
| <i>Diacodexis metsiacus</i>      | Rose, 1982                    | Early Eocene               | Asia-Eurpe                | 59           |
| <i>Cambaytherium thewissi</i>    | Rose, 2019                    | Early Eocene               | Asia                      | 163          |
| <i>Radinsky yupingae</i>         | Holbrook, 2014                | Late Paleocene             | Asia                      | 89           |
| <i>Pliolophus vulpiceps</i>      | Owen, 1858                    | Early Eocene               | Europe                    | 127          |
| <i>Hyracotherium vasacciense</i> | Kitts, 1956                   | Early Eocene               | North American-<br>Europe | 135          |
| <i>Eurohippus messelensis</i>    | Franzen and Habersetzer, 2017 | Middle Eocene              | Europe                    | 143          |
| <i>Orohippus osbornianus</i>     | Granger, 1908                 | Middle Eocene              | North American            | 140          |
| <i>Eohippus venticolus</i>       | Granger, 1908                 | Middle Eocene              | North American            | 138          |
| <i>Equus caballus</i>            | Bennett and Hoffmann, 1999    | Holocene                   | Asia                      | 527          |
| <i>Lambdaotherium popoagicum</i> | Lucas and Holbrook, 2004      | Early Eocene               | North American            | 186          |
| <i>Embolotherium andrewsi</i>    | Mihlbachler, 2008             | Middle Eocene (Duchesnean) | North American            | 728          |
| <i>Litolophus gobiensis</i>      | Bai et al., 2010              | Early Eocene               | Asia                      | 182          |
| <i>Lophiaspis maurettei</i>      | Vautrin et al., 2021          | Early Eocene               | Europe                    | 230          |
| <i>Moropus petersoni</i>         | Peterson, 1907                | Late Oligo-Early Mio       | North American-<br>Europe | 355          |
| <i>Ancylotherium pentelicum</i>  | Geraads et al., 2007          | Miocene                    | Europe                    | 668          |
| <i>Homogalax protapirinus</i>    | Holbrook et al., 2004         | Early Eocene               | North American            | 165          |
| <i>Isectolophus latidens</i>     | Holbrook et al., 2004         | Early Eocene               | North American            | 170          |
| <i>Heptodon</i>                  | Radinsky, 1965                | Early Eocene               |                           | >195         |

|                                     |                           |                                  |                     |      |
|-------------------------------------|---------------------------|----------------------------------|---------------------|------|
| <i>posticus</i>                     |                           |                                  |                     |      |
| <i>Eoletes gracilis</i>             | Lucas et al., 1997        | Early Eocene                     | Kazakhstan          | 126  |
| <i>Irenolophus qii</i>              | Bai et al., 2019          | Early Eocene                     |                     | 241  |
| <i>Colodon occidentalis</i>         | Colbert, 2004             | Early Oligo                      | North American      | 230  |
| <i>Tapirus terrestris</i>           | Padilla and Dowler, 1994  | Holocene                         | South American      | 335  |
| <i>Hyrachyus modestus</i>           | Bai et al., 2017          | Middle Eocene                    | North American      | 228  |
| <i>Rostriamynodon grangeri</i>      | William and Manning, 1986 | Late Eocene                      | North American-Asia | 560  |
| <i>Amyrnodon advenus</i>            | Wall, 1982                | Late Eocene                      | North American      | 487  |
| <i>Triplopus obliquidense</i>       | Peterson, 1919            | Late Eocene                      | North American      | 165  |
| <i>Hyracodon nebraskensis</i>       | Scott, 1941               | Early Oligocene                  | North America       | 291  |
| <i>Juxia sharamurensis</i>          | Qiu and Wang, 2007        | Middle Eocene                    | Asia                | 595  |
| <i>Paraceratherium lepidum</i>      | Qiu and Wang, 2007        | Late Oligocene                   | Asia                | 1325 |
| <i>Teletaceras radinskyi</i>        | Hanson, 1989              | Middle Eocene                    | North American      | 343  |
| <i>Trigonias osborni</i>            | Prothero, 2005            | Late Eocene                      | North American      | 515  |
| <i>Aprotodon lanzhouensis</i>       | Deng, 2006                | Late Oligocene-<br>Early Miocene | Asia                | 625  |
| <i>Diaceratherium shanwangensis</i> | Lu et al., 2021           | Late Oligocene-<br>Early Miocene | Europe-Asia         | 526  |
| <i>Plesiaceratherium</i>            | Lu et al., 2020           | Early Miocene                    | Europe-Asia         | 648  |
| <i>Coelodonta antiquitatis</i>      | Deng et al., 2011         | Pleistocene                      | Europe-Asia         | 780  |
| <i>Rhinoceros unicornis</i>         | IVPP OV 1383              | Holocene                         | Asia                | 675  |
| <i>Ceratotherium simum</i>          | IVPP OV 2629              | Holocene                         | Africa              | 797  |
